# Supplementary material
Source: PubMed Central journal article supplement (PMC3178184)

## Supplementary Material

### FigS1, related to Fig1

#### (A) Localization of CFP-FRB-ER and OMM-FKBP-YFP

Confocal images of RBL-2H3 cells expressing CFP-FRB-ER, OMM-FKBP-YFP and mtDsRed show the co-localization of OMM-FKBP-YFP with the mitochondria. The slight difference between the YFP and DsRed images could have resulted from sequential acquisition.

#### (B) Visualization of the rapamycin-induced tethering of the OMM to the ER in a z-series

Pseudo-3D projection of z-image stacks of a whole RBL-2H3 cell overexpressing the OMM-ER linkers. Distribution of CFP-FRB-ER and OMM-FKBP-mRFP before and after (10 min) rapamycin (100nM) treatment is shown.

#### (C) Lateral mobility of the inducible linker components in the ER and OMM

RBL-2H3 cells were co-transfected with OMM-FKBP-YFP and mRFP-FRB-ER. Middle: The confocal images show the distribution of the YFP fluorescence in a cell before (top) and after (bottom) 2-photon photobleaching (740 nm, Millenia V/Tsunami, 70% power) in a region of interest (ROI, 5x5  $\mu\text{m}$ , red dashed lines). Left: time courses of the mean fluorescence changes in the ROI and over the whole cell area (WC). In the case of the ER-targeted mRFP (bottom panel), rapid bleaching in the ROI is followed by a partial recovery and by a decrease at the WC level, indicating high mobility of the construct throughout the ER. By contrast, photobleaching of the OMM-targeted YFP (upper panel) is not followed by rapid fluorescence recovery in the ROI and the whole-cell fluorescence does not change significantly, reflecting that mitochondria consist of discrete structures with discontinuous membrane. Right: time courses of YFP fluorescence in individual mitochondria selected by the yellow masks. Traces 1 and 2 correspond to a mitochondrion located half inside (1) and half outside (2) the ROI. Note the similar bleaching kinetics and intensities, indicating rapid lateral diffusion of the construct in the OMM of a single mitochondrion.

### FigS2, related to Fig5

#### (A) ER-mitochondrial linkage by pericam-tagged linker

Fluorescent images of an RBL-2H3 cell overexpressing OMM-ER linker pairs show the distribution of OMM-pcm (green) and ER-mRFP (red) before and after (3 min) rapamycin (100nM) treatment. Note the rapamycin-induced colocalization of mRFP with pericam appearing in yellow on the green/red overlay images. Lower: Line scan type images were created by selecting a line parallel to the direction of the process, obtaining the corresponding fluorescent signal from every image in the time series and stacking the successive lines horizontally. This presentation shows the simultaneous rapamycin-induced

concentration of the OMM-pcm within mitochondria (see light green bars, left) and the redistribution of ER-mRFP to the same areas (dark green bars, right). Representative of 10 similar measurements.

**(B) Lack of an effect of rapamycin treatment on ER and mitochondrial  $\text{Ca}^{2+}$  handling**

Simultaneous measurements of  $[\text{Ca}^{2+}]_c$  (rhod2) and  $[\text{Ca}^{2+}]_m$  (compartmentalized furaFF) responses evoked by  $\text{IP}_3$  additions in suspensions of permeabilized RBL-2H3 cells. Rapamycin (rapa) was added during cell permeabilization similar to the experiments shown in Fig5.  $\text{IP}_3$  (100nM and 8  $\mu\text{M}$ )-induced  $[\text{Ca}^{2+}]_c$  and  $[\text{Ca}^{2+}]_m$  increase was monitored in control (black) cells or in cells pretreated with rapamycin (red). Left, analog traces (mean of 3 runs for each condition), right: bar charts (n=6).

**FigS3, related to Fig6**

**(A) Suppression of the Cch-induced  $[\text{Ca}^{2+}]_{\text{Nuc}}$  signal in EGTA/AM loaded cells**

RBL-2H3 cells transiently overexpressing type1 muscarinic receptor and Nuc-pcm were preincubated with (thin line) or without (thick line) EGTA/AM and were stimulated with saturating dose of carbachol (Cch 100  $\mu\text{M}$ ) in  $\text{Ca}^{2+}$ -free extracellular buffer. Each trace represents the mean of 3 separate measurements.

**(B) Calibration of the pericam ratio in terms of nM  $[\text{Ca}^{2+}]$  (related to Fig5 and Fig6)**

The gray symbols and trace (sigmoid) show the OMM-pcm-ER ratio values recorded at various  $[\text{Ca}^{2+}]$  (calibrated from the simultaneously measured rhod2 fluorescence).

When the  $\text{IP}_3$ -induced  $[\text{Ca}^{2+}]_{\text{ER-mt}}$  was measured in the EGTA/ $\text{Ca}^{2+}$  (100 $\mu\text{M}$ /40 $\mu\text{M}$ ) buffer containing medium, a large  $\text{CaCl}_2$  pulse (60 $\mu\text{M}$ ) was added as a reference in the end of the recording. The addition of  $\text{CaCl}_2$  increased  $[\text{Ca}^{2+}]_{\text{rhod2}}$  from 100nM to 3.1 $\mu\text{M}$  (lower horizontal dashed arrow). The corresponding  $R_{\text{pcm}}$  value was used as a reference ( $\Delta R_{\text{Ref}}$ ) for the  $\text{IP}_3$ -induced  $\Delta R$  (50% in this case). The nM  $[\text{Ca}^{2+}]$  that belongs to the 50%  $\Delta R$  increase was then read from the x scale (540nM, see solid arrows). Thus, the  $[\text{Ca}^{2+}]_{\text{ER-mt}}$  rise evoked by  $\text{IP}_3$  addition attained 540nM, while the bulk  $[\text{Ca}^{2+}]_c$  ( $[\text{Ca}^{2+}]_{\text{rhod2}}$ ) remained essentially unchanged (100nM) (see Fig5B, thick red traces).

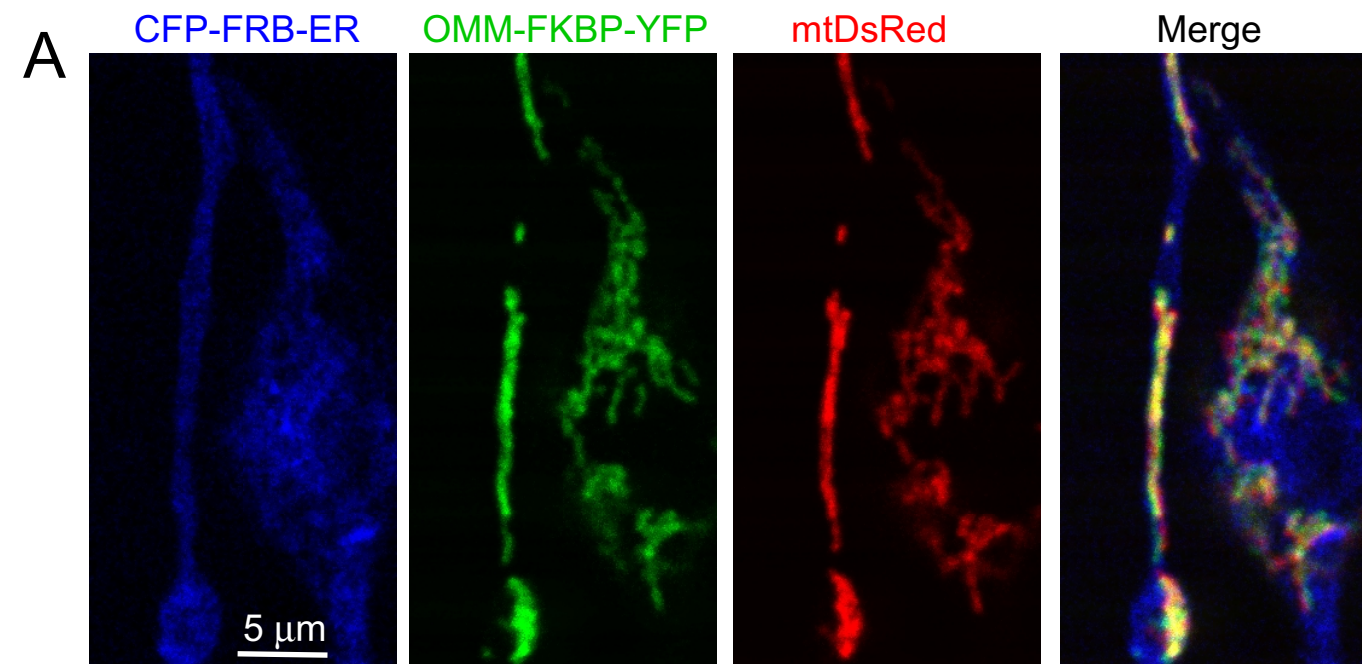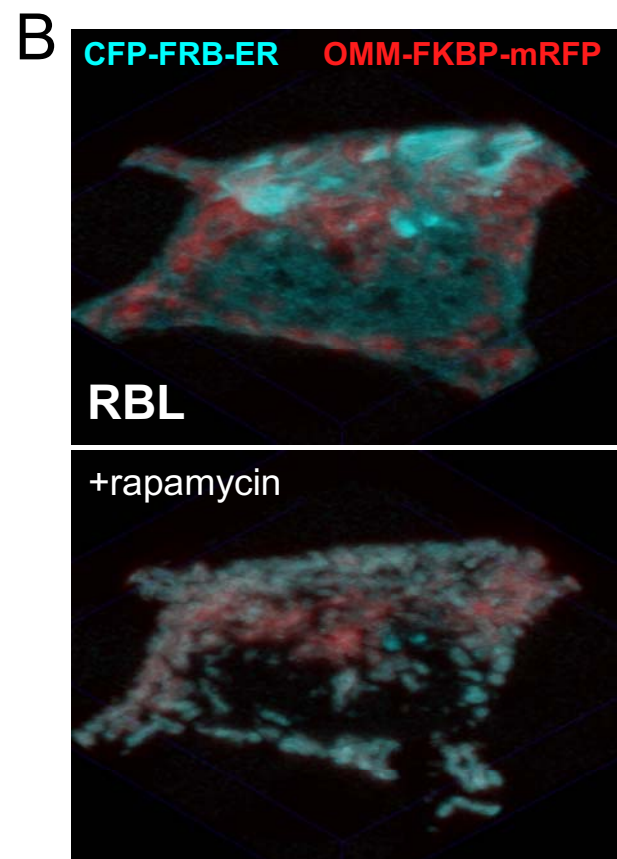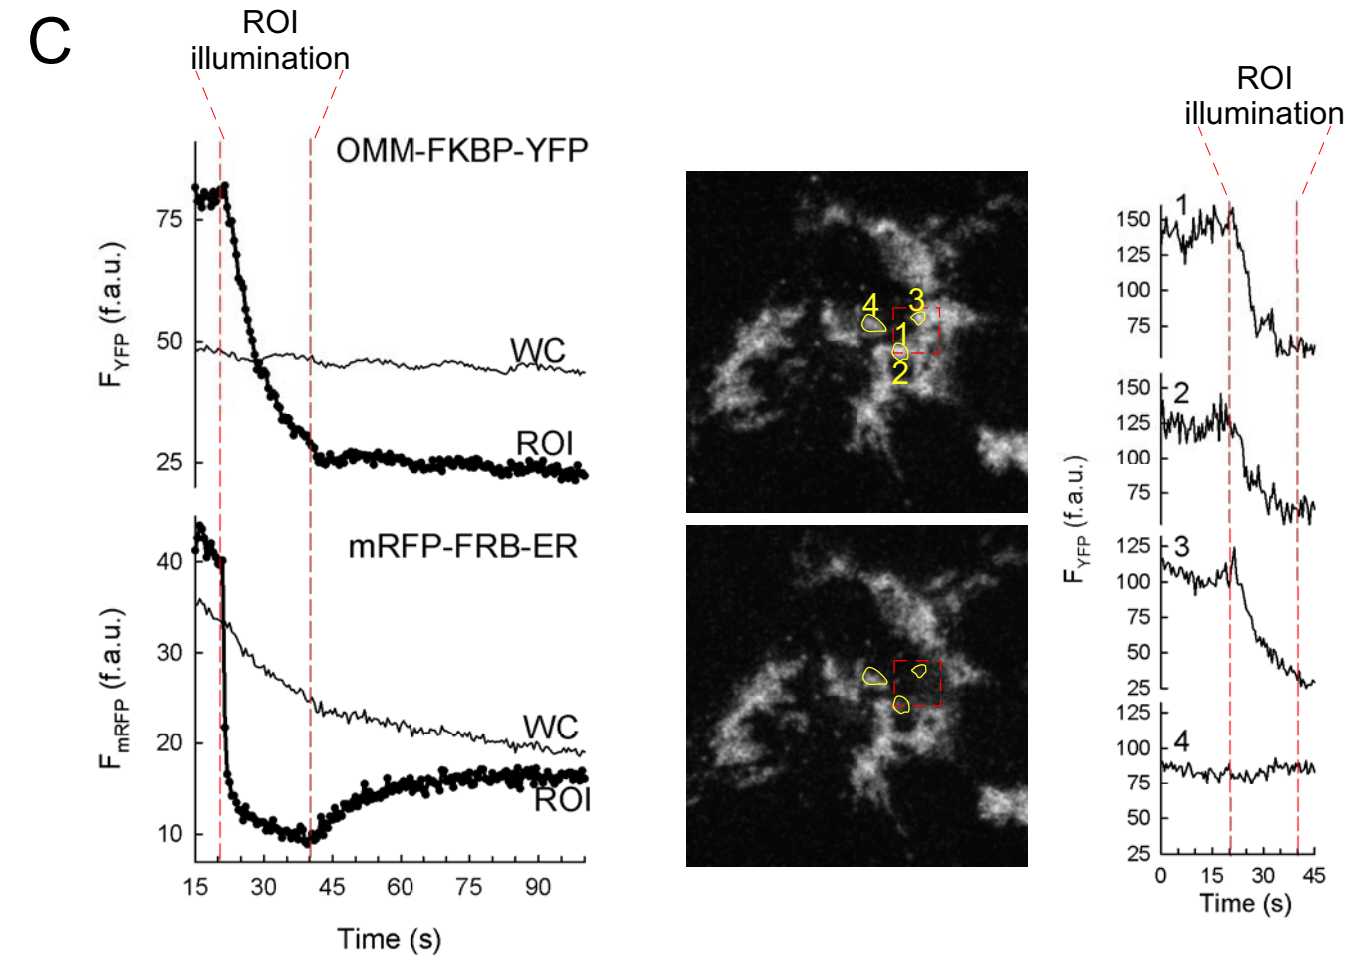

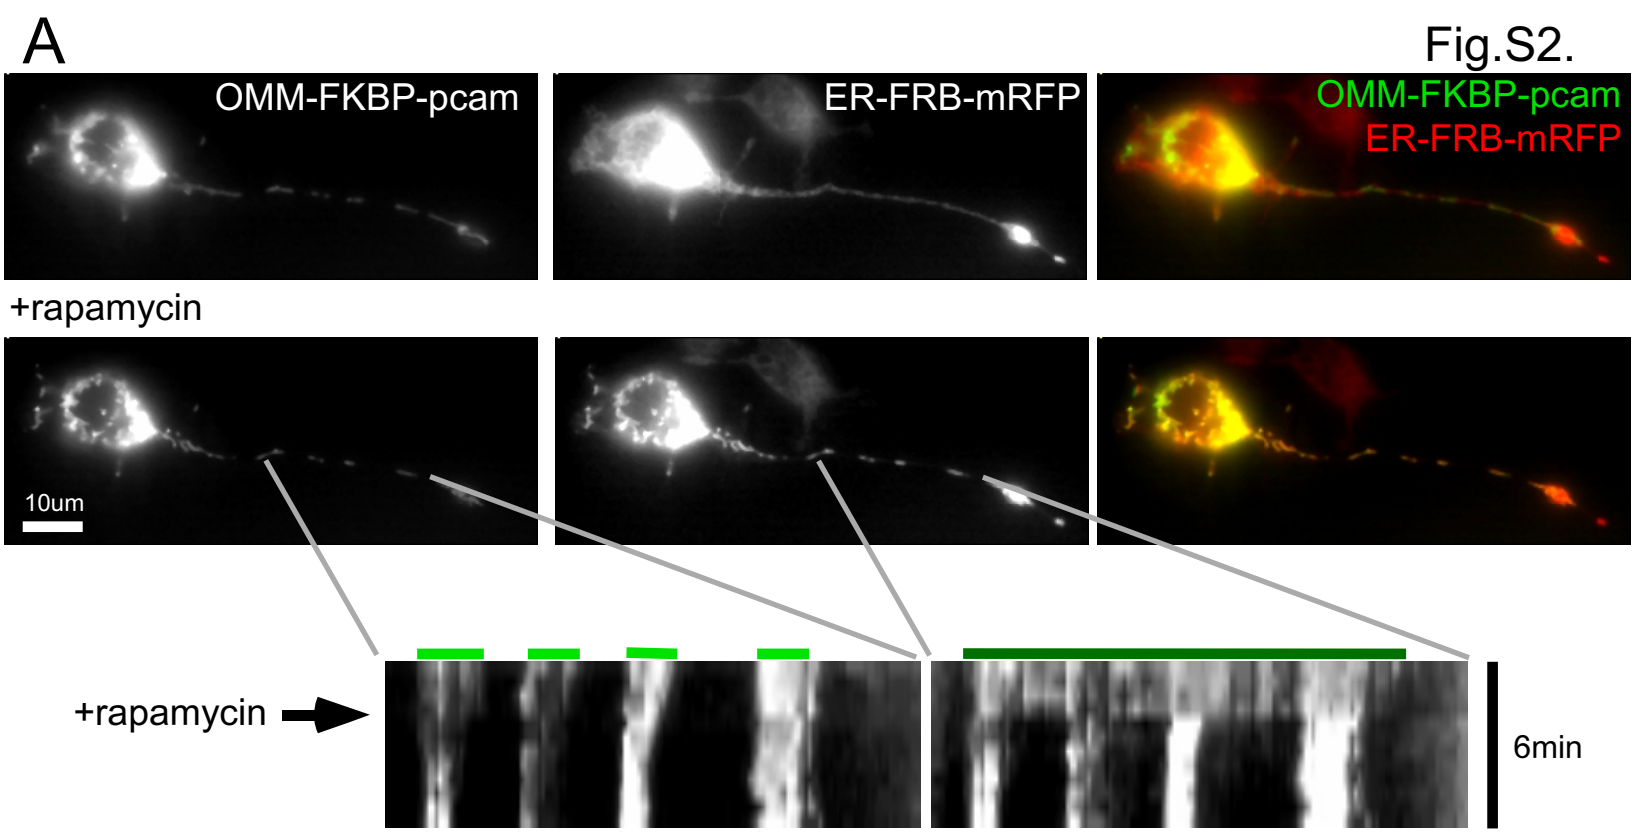**B**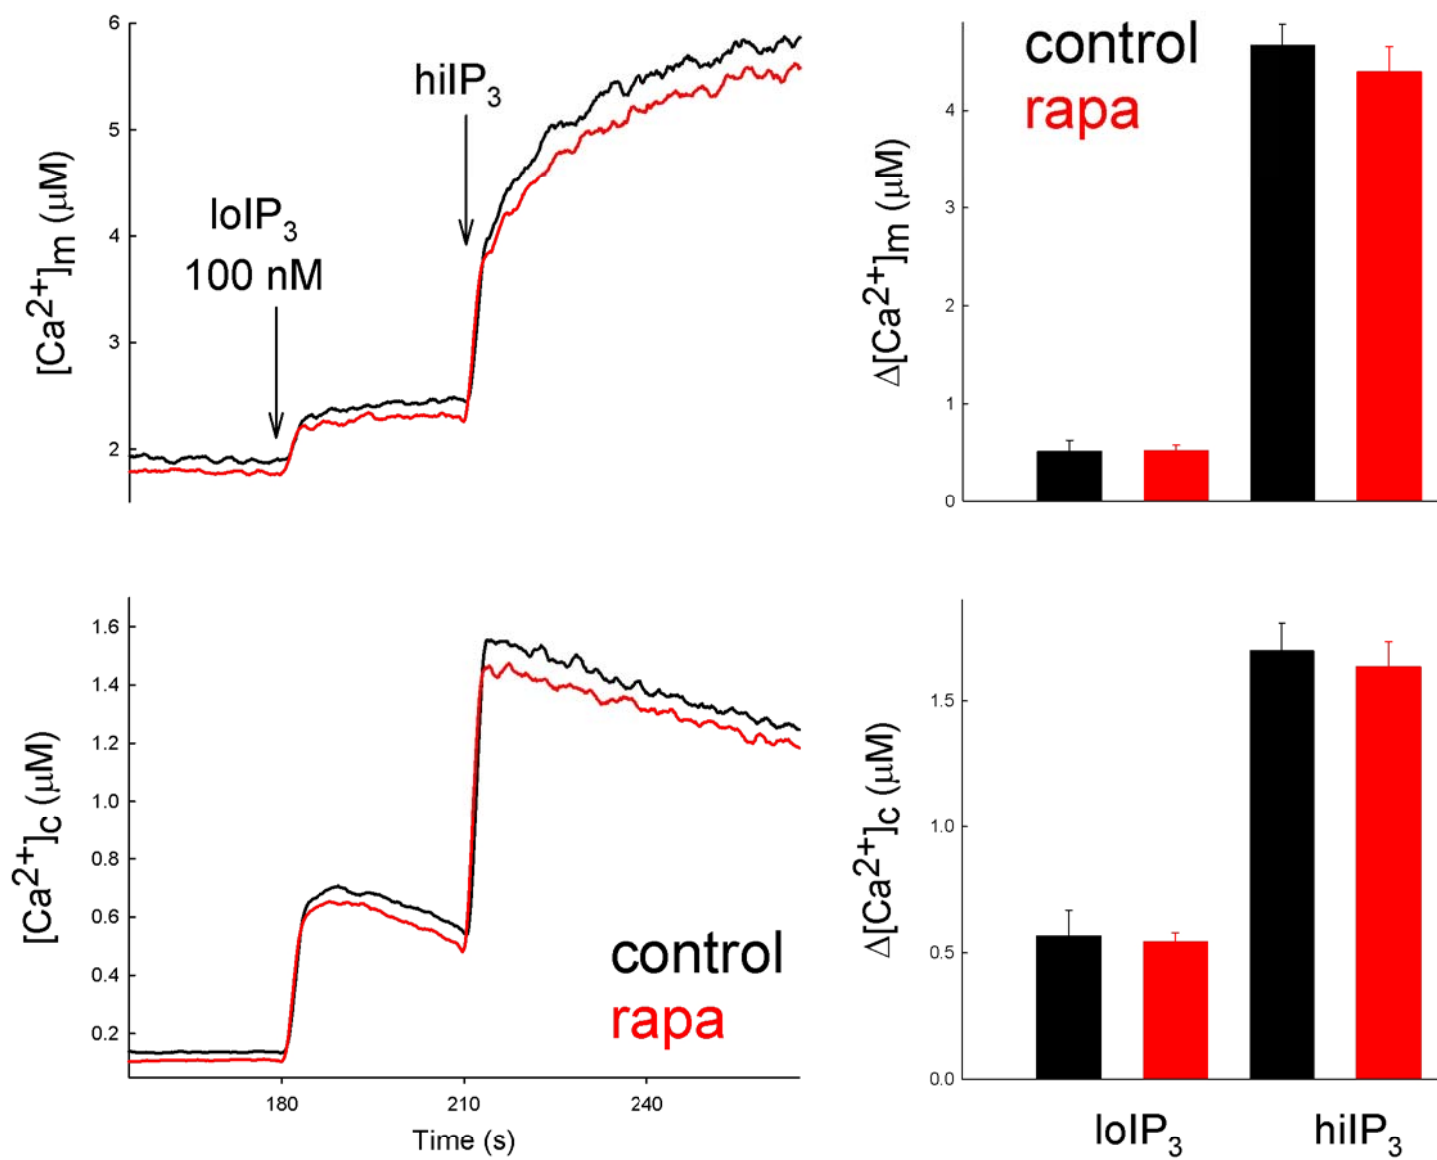

A

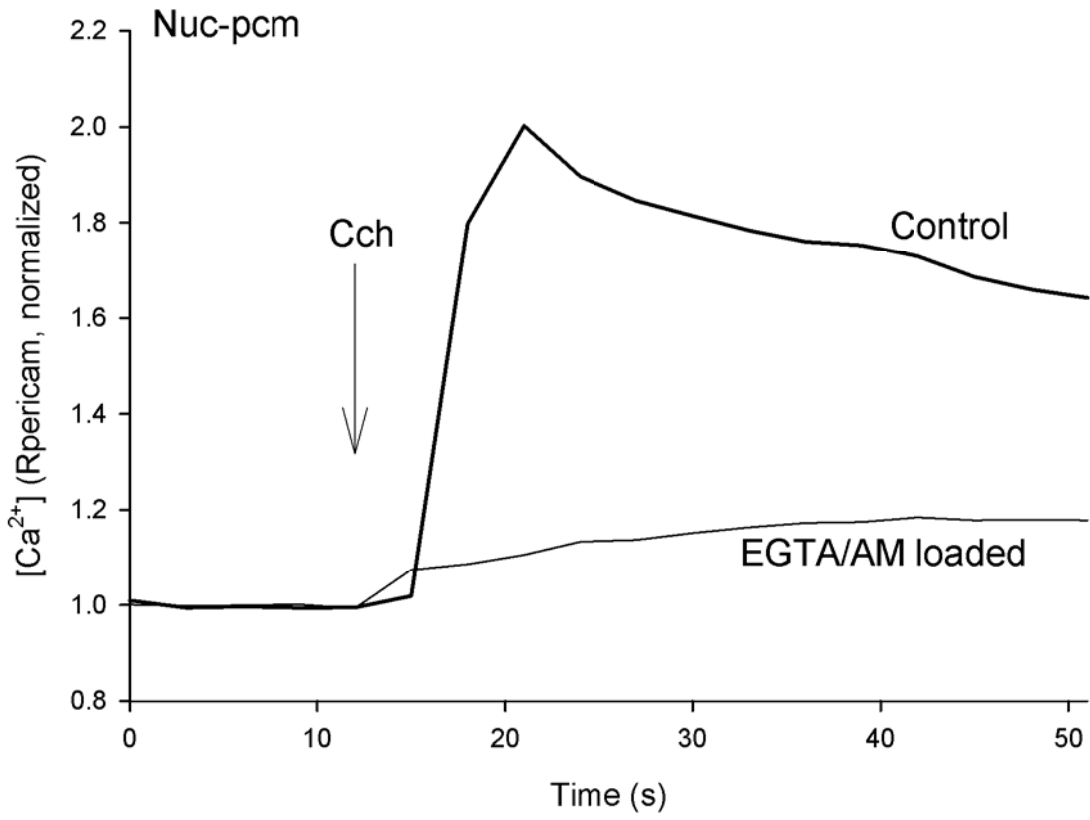

B

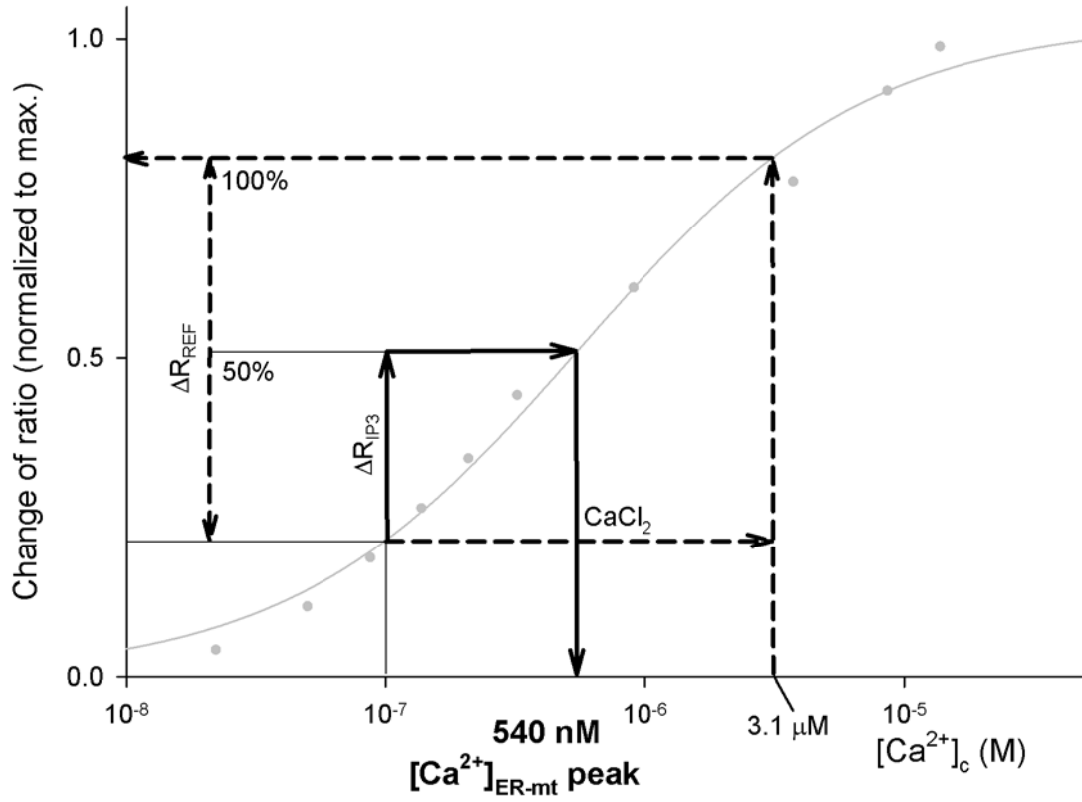

Supplement: NIHMS218560-supplement-01.pdf [file NIHMS218560-supplement-01.pdf]
